# Supplementary material for: Web-Enhanced Tobacco Tactics With Telephone Support Versus 1-800-QUIT-NOW Telephone Line Intervention for Operating Engineers: Randomized Controlled Trial
Source: PubMed Central journal article supplement (PMC4260077; doi:10.2196/jmir.3375), 2014-11-20
Supplement: jmir_v16i11e255_app1.pdf [file jmir_v16i11e255_app1.pdf]

## Usage and Satisfaction with Tobacco Tactics and 1-800-QUIT-NOW Interventions

| Group                                              | Website                  | 1-800-QUIT-NOW          | P-Value         |
|----------------------------------------------------|--------------------------|-------------------------|-----------------|
|                                                    | Frequency (%)<br>(n=67)  | Frequency (%)<br>(n=78) |                 |
| Contacts with the intervention<br>(n=126)          | 67 (100)                 | 11 (14)                 | <b>&lt;.001</b> |
| Visits to the website                              | 66 (99)                  | N/A                     |                 |
| Received phone calls (n=145)                       | 60 (90)                  | 11 (14)                 | <b>&lt;.001</b> |
| NRTs (n=145)                                       | 48 (70)                  | 4 (5)                   | <b>&lt;.001</b> |
| Patches                                            | 29 (40)                  | 2 (3)                   | <b>&lt;.001</b> |
| Gum                                                | 40 (60)                  | 1 (1)                   | <b>&lt;.001</b> |
| Lozenges                                           | 6 (9)                    | 0 (0)                   | <b>&lt;.009</b> |
| Patches and gum or lozenges                        | 24 (36)                  | 0 (0)                   | <b>&lt;.001</b> |
|                                                    | Mean (SD)<br>(n=51)      | Mean(SD)<br>(n=11)      | P-Value         |
| Visits to the website (n=67)                       | 2.7 (3.7)<br>Range: 0-26 | NA                      |                 |
| Helpfulness of Phone Calls (n=62)                  | 4.0 (1.0)                | 3.3 (0.7)               | <b>.023</b>     |
| Opinion about number of calls                      | 3.3 (1.1)                | 3.1 (1.0)               | .604            |
| Received (n=47)                                    |                          |                         |                 |
| Comfort asking questions (n=62)                    | 4.2 (0.8)                | 3.5 (0.7)               | <b>.010</b>     |
| Satisfaction with the answers<br>(n=62)            | 4.3 (0.7)                | 3.6 (0.5)               | <b>.003</b>     |
| Level of support provided (n=62)                   | 4.3 (0.7)                | 3.5 (0.5)               | <b>&lt;.001</b> |
| Helpfulness of NRTs (n=41)                         | 4.0 (1.0)                | 3.8 (0.5)               | .693            |
| Willingness to recommend to<br>someone else (n=62) | 4.0 (0.6)                | 3.7 (1.0)               | .171            |
